# Supplementary material
Source: MDPI journal article supplement (https://www.mdpi.com/2673-592X/3/1/2)

Fig. 7 A

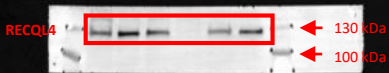

Fig. 7 B Total

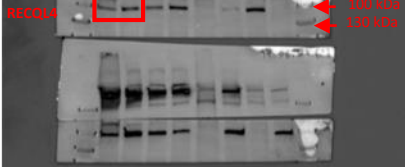

Fig. 7 B Cyto

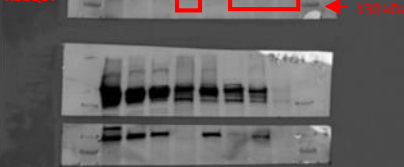

Fig. 7 A

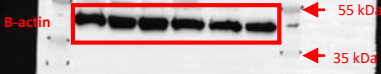

Fig. 7 B Total

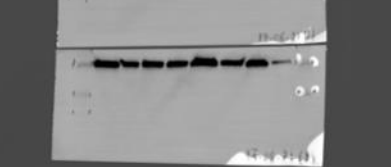

Fig. 7 B Cyto

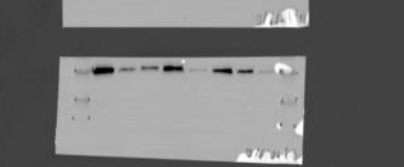

Fig. 7 C

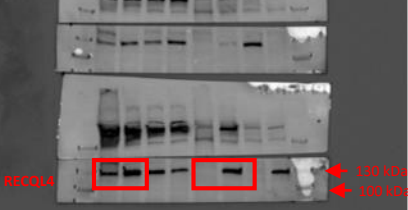

Fig. 7 D

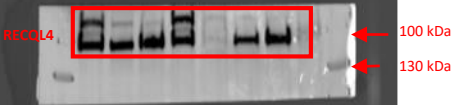

Fig. 7 C

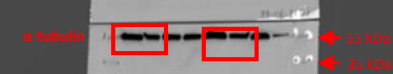

Fig. 7 D

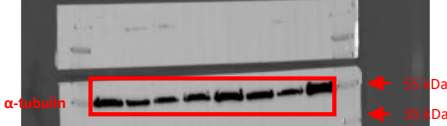

Supplement: s1 [file s1]
